# Supplementary material for: The recombination dynamics of Staphylococcus aureus inferred from spA gene
Source: PubMed Central journal article supplement (PMC4940709; doi:10.1186/s12866-016-0757-9), 2016-07-11
Supplement: 12866_2016_757_MOESM1_ESM.pdf [file 12866_2016_757_MOESM1_ESM.pdf]

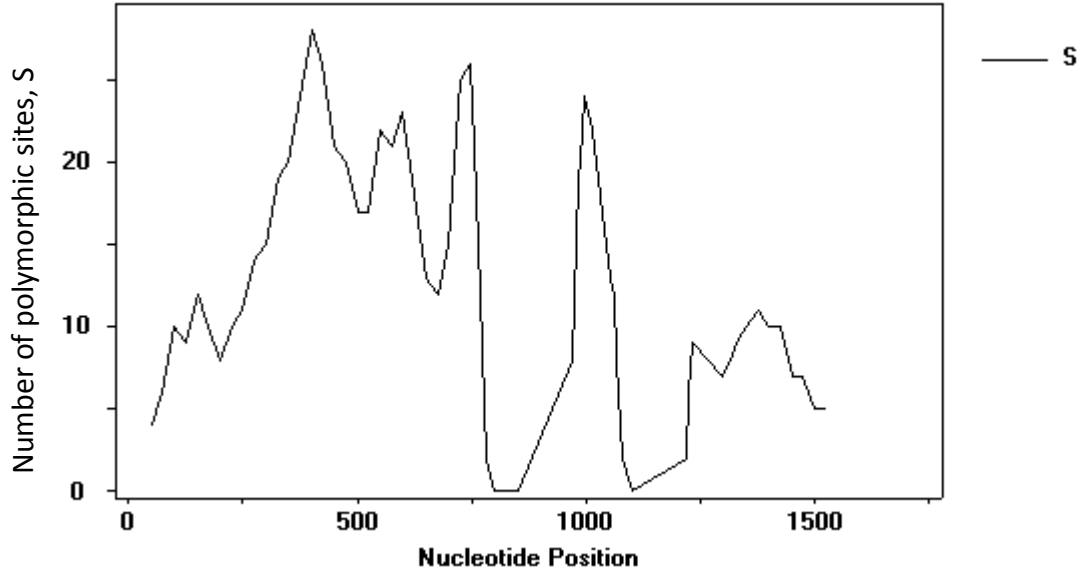

**Figure S1. Nucleotide polymorphism in *spA* from *S. aureus* studied strains.** Sliding window plot of number of polymorphic sites (S) along the *spA* gene generated by DnaSP ver. 5.10.00 with a window length of 100 bp and step size of 25 bp.
