# Supplementary material for: The recombination dynamics of Staphylococcus aureus inferred from spA gene
Source: PubMed Central journal article supplement (PMC4940709; doi:10.1186/s12866-016-0757-9), 2016-07-11

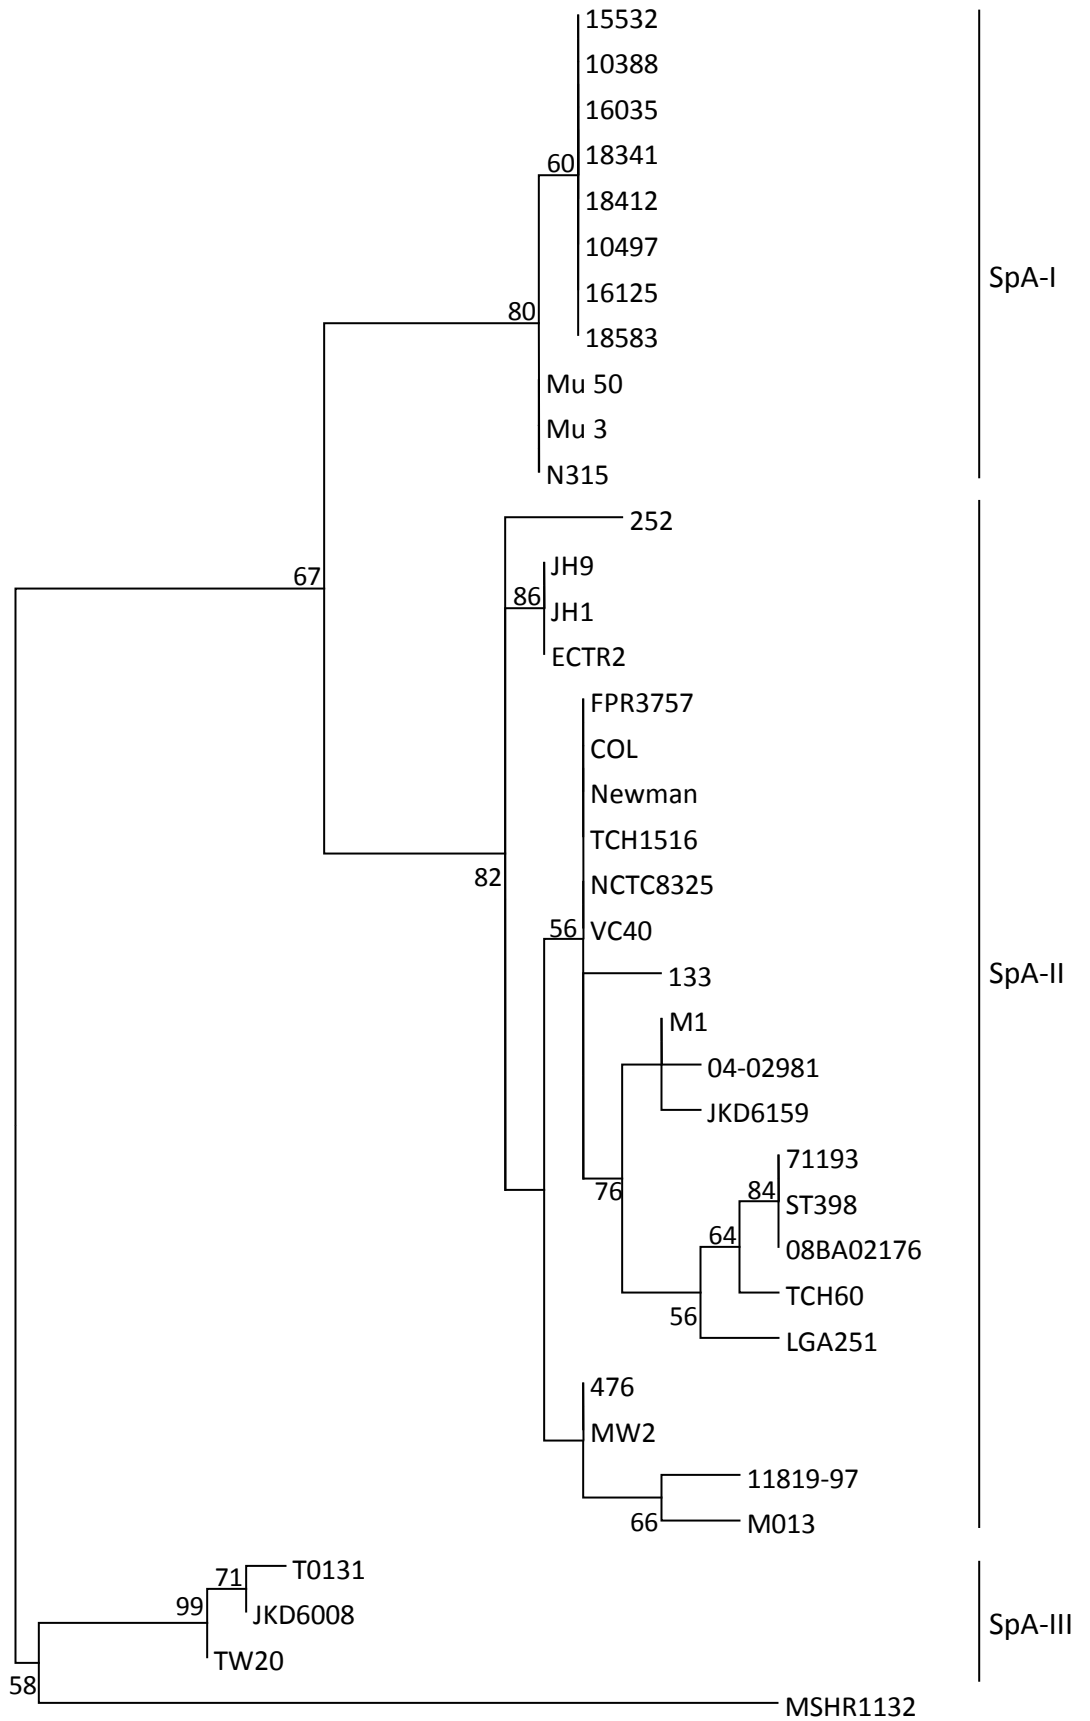

Supplement: 12866_2016_757_MOESM3_ESM.pdf [file 12866_2016_757_MOESM3_ESM.pdf]
