# Supplementary material for: The recombination dynamics of Staphylococcus aureus inferred from spA gene
Source: PubMed Central journal article supplement (PMC4940709; doi:10.1186/s12866-016-0757-9), 2016-07-11
Supplement: 12866_2016_757_MOESM4_ESM.pdf [file 12866_2016_757_MOESM4_ESM.pdf]

**Table S1. Potential recombinant events (PRE) identified with RDP3 from the alignment of *spa* from 38 *S. aureus* strains.** The minimum number of independent recombination events (IREs) within each identified PRE was inferred by a minimum of three methods.

| PRE | Breakpoints         | IREs | <i>p</i> -Val          | Recombination detection tests |          |        |          |        |          |
|-----|---------------------|------|------------------------|-------------------------------|----------|--------|----------|--------|----------|
|     |                     |      |                        | RDP                           | GENECONV | MaxChi | Chimaera | SiScan | Bootscan |
| 1   | 665-1211<br>357-884 | 11   | 2.15x10 <sup>-18</sup> | 11                            | 11       | 11     | 11       | 6      | 11       |
| 2   | 733-884             | 3    | 1.07x10 <sup>-3</sup>  | 3                             | 3        | 3      | 3        | 3      | 3        |
| 3   | 98-1115             | 3    | 2.14x10 <sup>-18</sup> | 3                             | 3        | 3      | 3        | 3      | 3        |
| 4   | 888-1018            | 1    | 2.61x10 <sup>-7</sup>  | 1                             | -        | 1      | -        | -      | 1        |
| 5   | 1065-349            | 1    | 7.72x10 <sup>-5</sup>  | -                             | -        | 1      | -        | 1      | 1        |
