# Supplementary material for: The recombination dynamics of Staphylococcus aureus inferred from spA gene
Source: PubMed Central journal article supplement (PMC4940709; doi:10.1186/s12866-016-0757-9), 2016-07-11
Supplement: 12866_2016_757_MOESM5_ESM.pdf [file 12866_2016_757_MOESM5_ESM.pdf]

**Table S2- Likelihood ratio tests of positive selection.**

| Breaking points | Partitions (codons)   | M8a             | M8              | 2(M8-M8a)    | <i>p</i> -value  |
|-----------------|-----------------------|-----------------|-----------------|--------------|------------------|
| All <i>spA</i>  | 1-1572<br>(1-525)     | <b>-3798.55</b> | <b>-3765.55</b> | 66           | <b>&lt;0.001</b> |
| 1               | 1-327<br>(1-109)      | -571.661        | -571.648        | 0.026        | no significante  |
| 2               | 328-648<br>(110-216)  | -790.111        | -790.11         | 0.002        | no significante  |
| 3               | 649-915<br>(217-305)  | -535,617        | -535,620        | -0,006       | no significante  |
| 4               | 916-1572<br>(306-525) | <b>-1784.74</b> | <b>-1768</b>    | <b>33.48</b> | <b>&lt;0.001</b> |

Column headings M8a and M8 denote the likelihood score. 2(M8-M8a) denote test statistic and *p*-value the level of significance of the test statistic. In all *spA* and in the partition 916-1572 the Likelihood Ratio Tests indicate high probability of evolution under positive selection. *p*-values below 0.01 are marked in bold.
